# Supplementary material
Source: Preprints.org preprint supplement (doi:10.20944/preprints202404.1385.v1)
Supplement: Supplementary file 1 [file supplementary]

	Main	Wx	(3)	(4)	LR_Direct	LR_Indirect	LR_Total	
VARIABLES	CBR	CBR	CBR	CBR	CBR	CBR	CBR	
								
lnscale_w	1.345**	1.676*			1.693**	4.058**	5.750***	
	(2.05)	(1.76)			(2.35)	(2.44)	(2.77)	
lnincome	-3.108**	2.156			-3.062***	1.253	-1.810***	
	(-2.39)	(1.50)			(-2.65)	(0.90)	(-2.92)	
lnedu_w	4.996**	-4.924			4.918**	-4.562	0.356	
	(2.06)	(-1.47)			(2.20)	(-0.94)	(0.07)	
lnSA_w	1.308	1.213			1.575*	3.139**	4.714***	
	(1.57)	(1.18)			(1.95)	(2.05)	(2.58)	
lnUCe	4.051***	0.057			4.317***	3.332	7.649***	
	(3.29)	(0.03)			(3.85)	(1.43)	(3.21)	
lnUCa	-0.249	-0.791			-0.368	-1.587	-1.955	
	(-0.70)	(-0.90)			(-1.15)	(-1.24)	(-1.54)	
dLI	-2.785*	0.634			-2.947*	-1.185	-4.131	
	(-1.69)	(0.32)			(-1.86)	(-0.43)	(-1.43)	
dSR_w	1.129	1.911			1.426*	4.171	5.598*	
	(1.52)	(1.29)			(1.85)	(1.63)	(1.91)	
lnpre	2.279***	-1.811**			2.228***	-1.363*	0.865*	
	(3.53)	(-2.48)			(3.87)	(-1.70)	(1.79)	
lntem_w	-2.333***	0.859			-2.375***	-0.477	-2.852*	
	(-2.99)	(0.77)			(-3.18)	(-0.31)	(-1.96)	
lnsun_w	-2.036*	2.049			-1.901*	1.917	0.016	
	(-1.80)	(1.42)			(-1.92)	(1.18)	(0.02)	
rho			0.467***					
			(8.56)					
sigma2_e				0.322***				
				(6.38)				
								
Observations	480	480	480	480	480	480	480	
R-squared	0.160	0.160	0.160	0.160	0.160	0.160	0.160	
Number of id	30	30	30	30	30	30	30	
ID FE	YES	YES	YES	YES	YES	YES	YES	
r2_w	0.497	0.497	0.497	0.497	0.497	0.497	0.497	
Robust z-statistics in parentheses
*** p<0.01, ** p<0.05, * p<0.1
